36 **Abstract**

37 Childhood maltreatment is among the most robust risk factors for subsequent psychiatric and  
38 medical disorders, and data in humans and rodents suggest that effects of adverse childhood  
39 experiences may be transmitted across generations. Recent indications for biological processes  
40 underlying this transfer of experiential effects are intriguing; yet, their relevance in primates is  
41 inconclusive due to limitations of current studies. In this study, we bridge research in rodent  
42 models and humans with a natural non-human primate model on intergenerational effects of  
43 childhood maltreatment. Using a unique, well-controlled, randomized cross-fostering design in  
44 rhesus monkeys, we test the influence of ancestral maltreatment on molecular, neuroendocrine  
45 and behavioral outcomes in offspring, and show that childhood maltreatment results in  
46 transmission of information to the subsequent generation independent of behavioral  
47 transmission. We further demonstrate differences in the offspring longitudinal DNA methylation  
48 profile of the *FKBP5* gene, an important regulator of the hypothalamus-pituitary-adrenal axis in  
49 offspring of the maltreatment lineage compared to the control lineage. Finally, we show that  
50 differences in *FKBP5* methylation have functional effects on molecular, neuroendocrine and  
51 behavioral outcomes in offspring of the maltreatment ancestral line, even if the infants were  
52 never exposed to maltreatment nor interacted with their exposed ancestors. Although the  
53 molecular mechanism underlying our observations remains unknown, our data point to a  
54 potential germline-dependent effect. In summary, our data suggest that history of maltreatment  
55 in primates can induce molecular and behavioral changes in a subsequent generation  
56 independent of behavioral transmission that may influence risk for mental and physical diseases  
57 across generations.

58  
59  
60  
61  
62  
63  
64  
65  
66  
67  
68  
69  
70

## 71 Introduction

72  
73 Exposure to childhood maltreatment is one the most important risk factors for a variety of  
74 psychiatric disorders <sup>1,2</sup>. However, both human studies and animal models suggest that effects  
75 of environmental experiences such as maltreatment extend beyond the affected individual,  
76 influencing phenotypes in subsequent generations. This sparked a controversial discussion on  
77 the prevalence of these phenomena, the underlying mechanisms and their biomedical relevance  
78 <sup>3-5</sup>. Strong evidence exists for effects of environmental cues on offspring phenotypes when  
79 exposed during *in utero* development <sup>6-8</sup>, or for the consequences of parental experience on  
80 offspring phenotypes mediated by parental behavior <sup>9</sup>. More recently, experiments in rodents  
81 suggested that pre-conceptional exposure to chemicals <sup>10</sup>, drugs <sup>11</sup>, nutritional abnormalities <sup>12</sup>  
82 and stress <sup>13-15</sup> can prompt intergenerational effects or even lead to transgenerational  
83 inheritance of specific phenotypes <sup>16</sup>. These events seem independent of *in utero* perturbations  
84 or behavioral transmission and point to possible germline-dependent mechanisms. Notably,  
85 some of the above studies have even demonstrated intergenerational transmission of  
86 phenotypes via *in vitro* fertilization. Although recent indications for similar effects with a focus on  
87 psychiatric phenotypes in humans are certainly intriguing, these studies are confounded by  
88 genetic, behavioral, nutritional, medical and socio-economic factors <sup>17-26</sup>. In addition,  
89 multigenerational studies in humans are extremely lengthy and difficult to control. It thus remains  
90 unclear if such mechanisms exist in humans and to what extent they may influence physical and  
91 mental health.

92  
93 Childhood maltreatment and other forms of early life stress (ELS) may cause alterations  
94 in long-term cellular programming of relevant pathways including stress response systems such  
95 as the hypothalamus-pituitary-adrenal (HPA) axis <sup>27-30</sup>. Epigenetic processes, often broadly  
96 defined in the sense of cellular reprogramming, have been proposed as attractive mechanisms  
97 to explain the influence of environmental factors on genome function in general, and the  
98 regulation of gene expression in particular <sup>31,32</sup>. However, there is an ongoing debate, particularly  
99 in primates, as to *if* and *how* environmental information can be transmitted or even inherited  
100 through the gametes across generations, potentially preparing the offspring generation for a  
101 similar environment through epigenetic adaptation <sup>16,33</sup>. In this study, we focus on the epigenetic  
102 regulation of FK506 binding protein 5 (*FKBP5*), a co-chaperone of the glucocorticoid receptor  
103 (GR), and an important regulator of the HPA axis influencing the negative feedback control of  
104 cortisol and GR activation across species. Prior genetic and epigenetic studies repeatedly  
105 implicated *FKBP5* as a risk factor for psychiatric disorders in response to childhood trauma <sup>34-42</sup>.

106 In fact, we and others have previously shown that childhood maltreatment in humans lead to  
107 changes in DNA methylation within the *FKBP5* gene, a dysregulation of the negative feedback  
108 mechanism towards the GR, and subsequently a higher risk for stress- and trauma-related  
109 disorders <sup>42,43</sup>.

110  
111 Very similar to humans, non-human primate (NHP) infants exhibit drastic socioemotional  
112 and neural development over a protracted postnatal period during which the infant is critically  
113 dependent on parental care <sup>44-46</sup>. Infant maltreatment occurs spontaneously in NHP species,  
114 both in captivity and in the wild, at rates similar to those seen in humans <sup>47-51</sup>. In rhesus  
115 monkeys, infant maltreatment has been operationalized by the co-occurrence of physical abuse  
116 and rejection of the infant by the mother during the first 3 to 6 months of life, leading to infant  
117 pain and distress and elevations of stress hormones <sup>45,52-55</sup>. Our group has extensively  
118 characterized the behavioral, neuroendocrine and neurodevelopmental impact of this  
119 naturalistic, translational NHP model of maltreatment. We previously demonstrated maltreatment  
120 effects on HPA axis hyperreactivity, telomere length, heightened anxiety and emotional  
121 reactivity, impulsive aggression and social deficits during development, effects which are  
122 consistent with chronic stress exposure <sup>46,55,56</sup>. Further, infant maltreatment leads to increased  
123 amygdala volumes associated with higher emotional reactivity <sup>57</sup> and reduces the integrity of  
124 brain white matter tracts that connect cortico-limbic regions important for processing of sensory  
125 and emotional stimuli <sup>58</sup>. Strikingly, infant maltreatment in NHPs is a relatively stable maternal  
126 trait, repeated with subsequent offspring and transmitted across generations <sup>48,59</sup>. This matches  
127 similar observations in humans showing that parents with a history of experiencing maltreatment  
128 are more likely to show abusive behavior towards their own children compared to parents  
129 without this history <sup>60</sup>. Previous studies revealed that cross fostering of infants from a maltreating  
130 line to a control line can often halt this vicious cycle, suggesting that the transmission of  
131 maternal maltreatment across generations is partially experiential and independent of genetic  
132 effects <sup>59</sup>. However, prior studies using this model did not consider the possible non-genetic  
133 transmission of maltreatment-related phenotypes across generations and their relevance for  
134 disease risk. Importantly, models of ELS or early rearing experiences in NHP support the  
135 hypothesis that effects of nursery rearing, variable foraging demand stress, and variations in  
136 normal nurturing behavior, among others, may be transmitted across generations <sup>61-64</sup>. Thus, we  
137 sought to use our ELS model with cross-fostering to examine the possibility of transmission of  
138 epigenetic risk in a well-controlled design. For this, we randomly assigned newborn macaques at  
139 birth from maltreating or competent care lineages to competent care mothers to specifically  
140 investigate the effect of pre-conceptual maltreatment in the maternal generation on the

141 offspring epigenetic profile and related phenotypes. We carefully generated these animals with  
142 high genetic and social rank diversity, by choosing them from different social ranks, matriline  
143 and paternities that were balanced across the experimental groups and sexes<sup>58,59,65</sup>.

144  
145 In summary, using a naturalistic model of ELS in NHPs, this study provides evidence for  
146 intergenerational, biological programming of *FKBP5* DNA methylation in response to ancestral  
147 maltreatment. Infant maltreatment in mothers, a pre-conceptual adverse experience, leads to a  
148 decrease in *FKBP5* DNA methylation, as well as HPA neuroendocrine and behavioral alterations  
149 in their offspring in the absence of direct interaction of the biological mother with the progeny  
150 (i.e. independent of maternal care). Our data highlight the long-term effects of childhood  
151 maltreatment across generations potentially increasing risk for psychiatric disorders.

152

## 153 **Results**

154

### 155 *Study Sample*

156

157 To investigate the contribution of ancestral maltreatment on the next generation molecular,  
158 neuroendocrine and behavioral phenotypes, we focus on infants born to maltreated (MALT) or  
159 control (CTRL) biological mothers that were randomly assigned and cross-fostered at birth to  
160 control foster mothers with a history of competent, nurturing maternal care (CTRL) following  
161 previous protocols<sup>58</sup>, thus creating two separate groups: CTRL-to-CTRL and MALT-to-CTRL  
162 (**Figure 1**). A summary of descriptive data of the cohort divided by biological mother, foster  
163 mother and offspring is provided in **Table 1**. The statistical results are presented as mean  $\pm$  SD  
164 throughout, unless otherwise indicated. Mean age (years) of the biological mothers was  $9.93 \pm$   
165  $3.35$  (MALT:  $9.77 \pm 3.86$ , CTRL:  $10.06 \pm 3.06$ ,  $t(18)=0.18$ ,  $p=0.85$ ); mean age of the foster  
166 mothers was  $10.43 \pm 3.35$  (MALT-to-CTRL:  $9.69 \pm 2.97$ , CTRL-to-CTRL:  $11.04 \pm 3.66$ ,  
167  $t(18)=0.89$ ,  $p=0.38$ ). Both, biological and foster mothers were experienced multiparas without  
168 significant differences with respect to parity (Biological MALT:  $4.11 \pm 2.76$ , Biological CTRL:  $3.64$   
169  $\pm 2.5$ ,  $t(18)=-0.40$ ,  $p=0.69$  and Foster MALT-to-CTRL:  $3.78 \pm 2.22$ , Foster CTRL-to-CTRL:  $4.09 \pm$   
170  $2.81$ ,  $t(18)=0.27$ ,  $p=0.78$ ) or gravida (Biological MALT:  $4.33 \pm 2.78$ , Biological CTRL:  $4.18 \pm 2.64$ ,  
171  $t(18)=0.13$ ,  $p=0.90$  and MALT to CTRL:  $4.56 \pm 2.56$ , CTRL to CTRL:  $4.82 \pm 3.13$ ,  $t(18)=0.20$ ,  
172  $p=0.84$ ). Importantly, biological mothers did not differ with respect to social rank distribution  
173 (MALT rank [high/middle/low]: 2/4/3, CTRL rank [high/middle/low]: 3/2/6  $X^2(2, N=20)=1.68$ ,  
174  $p=0.43$ ). Similarly, foster mothers did not show differences in social rank (MALT to CTRL rank  
175 [high/middle/low]: 3/5/1, CTRL- to-CTRL rank [high/middle/low]: 2/3/6  $X^2(2, N=20)=4.11$ ,

176 p=0.13). Offspring groups did not differ in sex (MALT: M/F=3/6, CTRL: M/F=6/5,  $X^2(1,$   
177  $N=20)=0.90$ ,  $p=0.34$ ) or rank movement between biological and foster mothers (MALT:  
178 [down/none/up]: 2/2/5, CTRL: [down/none/up]: 4/4/3,  $X^2(2, N=20)=1.65$ ,  $p=0.44$ ). Thus, groups  
179 were balanced with respect to known relevant confounding variables.

180

### 181 *Maternal phenotype and FKBP5 DNA methylation in the offspring*

182

183 Similar to evidence shown in humans, maltreatment in monkeys spans generations with females  
184 exposed to maltreatment being at higher risk to maltreat their own offspring<sup>48,59,65</sup>. To test the  
185 hypothesis that MALT in the biological mothers influenced cellular epigenetic programming in the  
186 offspring independent of maternal care, we measured *FKBP5* DNA methylation in intron 7,  
187 covering the genomic region investigated before in our human studies on childhood trauma<sup>42</sup>  
188 (**Supplemental Figure 1**). Focusing on the ancestral maternal phenotype (MALT vs. CTRL),  
189 linear mixed effect models show significant lower methylation in MALT offspring than CTRLs  
190 already present at birth at CpGs in and around the second glucocorticoid response element  
191 (GRE) of intron 7, which are orthologous to the sites found previously demethylated in the  
192 human *FKBP5* gene in childhood trauma studies<sup>26,35,42</sup>. After correction for multiple testing, DNA  
193 demethylation at CpG5 remains significant ( $\beta=0.28$ ,  $SE=0.08$ ,  $p=0.003$ ,  $p_{Bonferroni}=0.018$ ) (**Figure**  
194 **2**). Thus, in light of the cross-fostering design, our data provide strong evidence for an  
195 intergenerational effect of maltreatment on offspring *FKBP5* methylation mediated through  
196 mechanisms independent of behavior, with potential commonalities across primate species. Our  
197 data also provide evidence for a decrease in *FKBP5* DNA methylation across the normative  
198 development of these macaques between birth and 2 years of life. Across the observation period  
199 we detect a mean *FKBP5* DNA methylation difference of close to 25% (MALT:  $41.12\% \pm 14.90$   
200 vs. CTRL:  $65.75\% \pm 19.08$ ) with marked differences between day 2 and month 6 and a  
201 convergence of DNA methylation levels at month 24 (**Figure 2**). This is in line with a  
202 developmental increase of cortisol secretion observed in humans and NHPs<sup>66,67</sup>.

203

### 204 *Functional impact of differential methylation within FKBP5 GRE binding sequence*

205

206 We previously provided evidence for a functional role of DNA demethylation in and around GR  
207 binding sequences in human *FKBP5* intron 7<sup>42</sup> with demethylation leading to a stronger GR  
208 binding to the intron 7 enhancer element, stronger transcriptional activation of *FKBP5*, thus  
209 underlying a dysregulation of the negative feedback on GR function and higher cortisol levels  
210 over time. Using a competitive ELISA assay, we now tested how DNA methylation at CpG5,

211 which is located in the center of the GRE, affects binding of the GR in NHPs. Using 35mer  
212 synthetic oligonucleotides with either a methylated or unmethylated CpG5 cytosine, we found  
213 that the methylated GRE is less efficient in binding the GR compared to the unmethylated  
214 oligonucleotide in the macaque model (Mean absorbance 450/655nm, unmethylated=0.356 ±  
215 0.035, methylated=0.476 ± 0.046,  $t(4)=-3.59$ ,  $p=0.023$ ). These data suggest that the differential  
216 *FKBP5* DNA methylation even at a single CpG site observed *in vivo* in rhesus monkeys could be  
217 associated with differential GR binding and GR function at the cellular level.

218

#### 219 *DNA methylation of FKBP5 in biological mothers*

220

221 We next tested the possibility of differential *FKBP5* DNA methylation in the adult biological MALT  
222 mothers in comparison to the biological CTRL mothers. However, we did not observe a  
223 significant difference in DNA methylation between MALT and CTRL biological mothers (Mean %  
224 DNA methylation ± SD, MALT: 90.38 ± 8.29, CTRL: 91.56 ± 9.30,  $t(15)=0.28$ ,  $p=0.78$ )  
225 **(Supplemental Figure 2)**.

226

#### 227 *FKBP5 methylation and neuroendocrine outcomes in the offspring*

228

229 Prior evidence suggests an important role of *FKBP5* methylation in the regulation of the HPA  
230 axis function, in particular in stress-reactive glucocorticoid negative feedback and active stress  
231 response<sup>34</sup>. Using hair cortisol measurements at postnatal day 2 and 6 months of age, we  
232 aimed to assess *in utero* stress exposure of the newborns<sup>68</sup>, and HPA activity during the first 6  
233 postnatal months<sup>69</sup>, respectively and relate our findings of differential *FKBP5* DNA methylation  
234 in the offspring to neuroendocrine regulation.

235 The lack of group differences on day 2 hair cortisol levels (log transformed pg/mg hair)  
236 suggest that a potential *in utero* exposure to higher stress levels in MALT newborns is less  
237 conceivable and does not explain lower *FKBP5* methylation levels in MALT newborns (MALT:  
238 6.36 ± 0.28, CTRL: 6.28 ± 0.2,  $t(18)=-0.73$ ,  $p=0.47$ ) **(Supplemental Figure 3A)**. No significant  
239 correlations were detected, either, between postnatal day 2 *FKBP5* DNA methylation and hair  
240 cortisol levels in either the entire sample nor the individual groups, which supports the  
241 hypothesis that prenatal *in utero* stress exposure is not the primary cause of reduced *FKBP5*  
242 DNA methylation in MALT newborns (MALT:  $r(7)=-0.18$ ,  $p=0.70$ , CTRL:  $r(5)=0.35$ ,  $p=0.56$ ,  
243 Fisher z-score=-0.63,  $p=0.53$ ).

244 We next tested the hypothesis that the observed differences in *FKBP5* DNA methylation  
245 exert an effect on postnatal HPA axis activity as measured by cortisol accumulation in hair from

246 birth through month 6. Similar to our observations at day 2, there were no obvious group  
247 differences in hair cortisol levels between offspring from MALT and CTRL mothers (MALT:  $4.74$   
248  $\pm 0.22$ , CTRL:  $4.79 \pm 0.24$ ,  $t(16)=0.50$ ,  $p=0.63$ ) (**Supplemental Figure 3B**), which was expected  
249 given the non-MALT control environment provided by the CTRL foster mothers. However,  
250 *FKBP5* DNA methylation at month 6 showed an inverse correlation with month 6 hair cortisol  
251 between both groups (MALT  $r(8)=-0.76$ ,  $p=0.031$ , CTRL:  $r(8)=0.69$ ,  $p=0.06$ , Fisher z-score= $-2.9$ ,  
252  $p=0.003$ ) (**Figure 4**). This suggests a functional relationship between *FKBP5* DNA methylation  
253 and cortisol levels over time such that lower *FKBP5* DNA methylation in MALT offspring are  
254 associated with higher postnatal hair cortisol levels.

255 We corroborated these observations by analyzing associations with blood plasma cortisol  
256 levels. Neither day 2 baseline morning plasma cortisol (log transformed mean in ug/dl) (MALT:  
257  $1.91 \pm 0.25$ , CTRL:  $2.06 \pm 0.36$ ,  $t(15)=0.98$ ,  $p=0.34$ ) nor month 6 (MALT:  $2.50 \pm 0.17$ , CTRL:  
258  $2.37 \pm 0.15$ ,  $t(13)=-1.52$ ,  $p=0.15$ ) showed significant group differences. When calculating the  
259 mean plasma cortisol levels between day 2 and month 6 as a proxy for plasma cortisol levels  
260 over the first 6 months of life, we did not observe significant group differences either (MALT:  
261  $2.10 \pm 0.37$ , CTRL:  $2.18 \pm 0.20$ ,  $t(18)=0.65$ ,  $p=0.53$ ), which is congruent with our hair cortisol  
262 data. Correlations between day 2 plasma cortisol levels and day 2 *FKBP5* DNA methylation in  
263 MALT and CTRL offspring, were not statistically significant, either (MALT  $r(6)=-0.29$ ,  $p=0.96$ ,  
264 CTRL:  $r(4)=-0.2$ ,  $p=0.8$ , Fisher z-score= $-0.08$ ,  $p=0.94$ ). However, similar to our hair cortisol data,  
265 the cumulative plasma cortisol levels (day 2 to 6 months) significantly correlate with month 6  
266 *FKBP5* DNA methylation in MALT offspring, and shows a significant difference between MALT  
267 and CTRL (MALT  $r(8)=-0.86$ ,  $p=0.006$ , CTRL:  $r(10)=0.58$ ,  $p=0.08$ , Fisher z-score= $-3.34$ ,  
268  $p<0.001$ ). These data further support the observation that MALT individuals with lower month 6  
269 *FKBP5* DNA methylation have higher postnatal basal cortisol levels (i.e. HPA axis activation)  
270 over time.

271 In summary, cortisol data in hair and in plasma show no discernible group differences  
272 between offspring born to MALT vs. CTRL biological mothers, congruent with the competent  
273 maternal care both groups of infants experienced postnatally. However, offspring of biological  
274 MALT mothers that show reduced *FKBP5* DNA methylation levels show a significant negative  
275 correlation between DNA methylation and cortisol levels at month 6, but not at day 2 after birth,  
276 indicating that reduced DNA methylation may lead to increased cortisol levels postnatally. These  
277 data also suggest that although the baseline HPA axis activity is similar in MALT and CTRL  
278 offspring at birth, it may be differentially primed for responding to a stressful environment in the  
279 case of offspring of MALT biological mothers.

280



281 *FKBP5* methylation and behavioral outcomes in the offspring

282

283 Hair cortisol levels and basal morning plasma cortisol levels under non-stressful, resting

284 conditions may not entirely reflect the influence of *FKBP5* DNA methylation on the dynamic

285 regulation of the HPA axis. In absence of more direct readouts of the dynamic HPA axis

286 regulation in our cohort, we aimed to investigate behavioral effects under mild stressful

287 conditions with respect to ancestral phenotype and *FKBP5* DNA methylation. A broad body of

288 literature shows robust effects of childhood maltreatment and ELS on a spectrum of behavioral

289 outcomes in human and NHPs<sup>70-75</sup>. We hypothesized that MALT offspring will show deficits in

290 certain domains related to emotional and stress reactivity, compared to CTRLs. Therefore, we

291 studied the infant's behavioral reactivity at 6 months during the Human Intruder Test (HIT), a

292 standard NHP paradigm that assesses emotional regulation in response to increasing

293 environmental challenging conditions, and used to investigate stress and anxiety-related

294 behavioral responses<sup>56,57,76</sup>. Indeed, data from the HIT at 6 months suggests a functional effect

295 of *FKBP5* methylation on behavioral outcomes, particularly on measures of anxiety, locomotion,

296 freezing and vocalization during the 'alone', 'profile', and 'stare' conditions of the HIT<sup>57,76</sup>. We

297 found a significant group difference for locomotion during the 'profile' condition with MALT

298 individuals showing increased locomotion compared to CTRL (log transformed mean %

299 locomotion during 10 min observation period) (MALT:  $-2.42 \pm 0.65$ , CTRL:  $-6.82 \pm 3.86$ ,  $t(17)=-$

300  $3.7$ ,  $p=0.004$ ) (**Figure 5A**). Significant negative correlations were detected between *FKBP5* DNA

301 methylation at month 6 and anxiety-like responses during the 'alone' condition ( $r(17)=-0.53$ ,

302  $p=0.03$ ), and anxiety behaviors and locomotion during the 'profile' condition ( $r(17)=-0.53$ ,  $p=0.03$

303 for anxiety and  $r(17)=-0.62$ ,  $p=0.008$  for locomotion), indicative of increased overall anxiety-like

304 behaviors and locomotion in individuals with reduced *FKBP5* DNA methylation (**Table 2, Figure**

305 **5B**).

306

307 **Discussion**

308

309 The transmission of environmental information and experiences across generations and

310 their importance for relevant molecular, physiological, behavioral and medical phenotypes

311 remains a critical, yet still controversial question. Although recent studies in humans may

312 suggest inter- and even transgenerational transmission or inheritance of acquired phenotypes,

313 the limitations of current experimental designs and approaches prevent more definitive answers

314 as to what extent the environment can influence phenotypes across generations and what the

315 underlying mechanisms are in primates.

316

317 In this study, we leveraged a unique, well-controlled randomized cross-fostering design in  
318 rhesus monkeys, where newborn macaques from infant maltreating or competent, nurturing care  
319 lineages were adopted and raised by competent, nurturing foster mothers. Importantly,  
320 maltreatment appears to be a stable and natural phenotype discernible in captivity and in the  
321 wild, which is not provoked through experimental conditions and is thus well suited as a  
322 translational model for childhood maltreatment in humans. The cross-fostering design enables  
323 us to specifically investigate the influence of the ancestral experience of the biological mother on  
324 molecular, neuroendocrine, and behavioral outcomes in the offspring. In our studies, offspring  
325 were cross-fostered immediately at birth, and animals grew up under competent maternal care  
326 conditions, not exposed to maltreatment and without contact with the MALT biological mother,  
327 thus preventing behavioral transmission of information. Moreover, the longitudinal design of this  
328 study allowed us to investigate molecular phenotypes across developmental trajectories in the  
329 offspring from birth through the juvenile, prepubertal period. Of note, the design excluded major  
330 confounding factors as both groups were balanced with regard to sex of the offspring and age,  
331 rank, parity, and gravity status of both the biological and foster mothers. In addition, all  
332 individuals shared a similar environment with regard to housing, nutrition, veterinary care, and  
333 exposure to natural conditions at the Yerkes National Primate Research Center (YNPC) Field  
334 Station in Lawrenceville, GA.

335

336 We show that ancestral maltreatment in the biological mother leads to reduced *FKBP5*  
337 DNA methylation in offspring at birth and during the infant period, providing evidence for an  
338 intergenerational effect of childhood maltreatment on epigenetic programming in this NHP  
339 primate model. These results are in line with our observations in humans exposed to sexual and  
340 physical maltreatment during childhood<sup>42</sup> suggesting comparable programming of DNA  
341 methylation in *FKBP5* in response to childhood maltreatment across species with similar spatial  
342 and directional effects. Moreover, studies in rodents exposed to glucocorticoids demonstrated  
343 similar results suggesting conserved mechanisms across a wide range of species<sup>77</sup>. Infant  
344 macaques born to biological MALT mothers showed lower *FKBP5* DNA methylation levels than  
345 individuals born to biological CTRL mothers, a difference that is already present at day 2 after  
346 birth and lasting at least until 6 months of age (**Figure 2**). The convergence of MALT and CTRL  
347 offspring methylation profiles may reflect a compensatory role of the control postnatal  
348 environment in which all offspring monkeys were raised. The CpGs found demethylated in prior  
349 human studies<sup>26,35,42,78-80</sup> and in this report are spatially central to a functional enhancer element  
350 that harbors glucocorticoid response elements (GREs) in intron 7 of *FKBP5*. These GREs

351 regulate the dynamic transcriptional response of *FKBP5* and thus HPA axis activity, the stress  
352 response and glucocorticoid negative feedback<sup>26,34,35,42,78,79,81,82</sup>. Our findings in macaques are  
353 consistent with that literature, showing that DNA methylation in the central CpG5 position of the  
354 *FKBP5* intron 7 GRE in the macaque gene influence GR binding *in vitro*, and are subsequently  
355 associated with differential FKBP5 regulation of GR feedback and peripheral cortisol levels.

356  
357         Although we cannot definitively exclude the influence of underlying genetic variants in  
358 these monkeys, several aspects make this assumption less likely. First, the behavioral  
359 phenotype of infant maltreatment in these monkeys is genotype independent, cross fostering  
360 effectively stops the transmission of this behavior, excluding a strong genetic effect. Second,  
361 individuals included in this study came from different genetic backgrounds as part of the overall  
362 breeding scheme of the YNPRC. Third, for a fixed genetic effect, we would assume that DNA  
363 methylation differences are rather stable over time and across generations, which is not the case  
364 in our data. When testing the biological mothers for their *FKBP5* DNA methylation profiles, we  
365 did not observe significant differences. This indicates that the differences we detect during the  
366 first months of development in the offspring may not be stable across life, which is in line with  
367 our observation that methylation differences between groups show no difference at 24 months.  
368 This observation is in contrast to findings in humans where differences in *FKBP5* DNA  
369 methylation appear to remain stable into adulthood<sup>35,42</sup>. However, human studies typically  
370 involve an environment that remains similar throughout life. Individuals exposed to childhood  
371 maltreatment often continue to live in stressful environments as reflected by the subsequent  
372 exposure to adult trauma and other factors such as low socioeconomic status<sup>83,84</sup>. Data  
373 presented here in fact support the notion that a non-stressful postnatal environment (in this case,  
374 competent maternal care postnatally) may mitigate the intergenerational transmission of risk in  
375 form of *FKBP5* DNA methylation as seen by the end of the study period where DNA methylation  
376 differences disappear between offspring of biological MALT and CTRL mothers. This is also in  
377 line with previous observations suggesting that cross-fostering offspring from MALT biological  
378 mothers to CTRL foster mothers inhibit the transmission of maltreatment across generations<sup>59</sup>.  
379 This is indicative of a non-genetic intergenerational transmission of this particular behavior. Our  
380 data show that there are, however, other long-term molecular, neuroendocrine and behavioral  
381 alterations detectable in offspring born to MALT in contrast to CTRL lineages, independent of  
382 postnatal maternal care received. Nevertheless, these differences seem not sufficient to induce  
383 the MALT phenotype.

384  
385         DNA methylation in *FKBP5* has been associated with the function of the HPA axis,

386 dynamic cortisol release and negative feedback signaling of *FKBP5* towards the glucocorticoid  
387 receptor. We previously provided evidence for a negative correlation of *FKBP5* DNA methylation  
388 and cortisol levels in line with a dysregulation of the HPA axis in humans exposed to trauma or  
389 severe stress<sup>42</sup>. Thus, we hypothesized that regulation of the HPA axis is altered in MALT  
390 offspring compared to CTRL. Hair cortisol concentrations are indicative of prolonged cortisol  
391 accumulation and provide a retrospective reflection of integrated cortisol secretion over periods  
392 of several months in humans and non-human primates<sup>69,85</sup>. In addition, hair cortisol levels in  
393 newborn monkeys are reflective of *in utero* stress exposure<sup>68</sup>. We used hair cortisol collected on  
394 day 2 after birth to test whether prenatal stress could explain the lower *FKBP5* methylation in  
395 offspring from MALT lineages compared to CTRL offspring. However, the lack of differences  
396 between groups ruled out this possibility. This may also point to a mechanism of transmission  
397 that includes early effects of maltreatment on the germline cell biology; however, we cannot  
398 exclude the possibility of *in utero* stress effects independent of our hair cortisol readout. Lower  
399 *FKBP5* DNA methylation levels in humans are associated with less effective negative feedback  
400 on the HPA axis and higher cortisol levels over time<sup>26,42,86,87</sup>. In line with these observations, a  
401 negative correlation of *FKBP5* DNA methylation at month 6 with elevated HPA axis activity as  
402 measured by both elevated hair and plasma cortisol levels at 6 months was observed in  
403 offspring from MALT biological mothers. These findings support prior evidence of disturbed  
404 feedback mechanisms of *FKBP5* on the GR and provide evidence for important functional  
405 effects of *FKBP5* DNA methylation differences in the rhesus offspring. It is important to note that  
406 we did not detect group differences in hair and plasma cortisol at month 6, which is actually in  
407 line with the function of *FKBP5* as a regulator of the *dynamic* feedback after stress exposure.  
408 Since MALT and CTRL offspring are raised in control environmental conditions, we would not  
409 expect to be able to detect baseline differences due to a lack of major postnatal stressful  
410 conditions for both groups. However, to test the dynamic response of MALT and CTRL offspring  
411 to a stressful event, we choose the Human Intruder Test (HIT) a mildly stressful task, similar to  
412 the Strange Situation Test used in human children<sup>76,88</sup> that assesses the response to changing  
413 environmental conditions and induces stress and anxiety-related behaviors. Testing the NHP  
414 offspring in the 'alone' condition primarily assesses anxiety-related and vocalization phenotypes  
415 whereas the 'profile' and 'stare' conditions evaluate aggressive behaviors, locomotion and  
416 freezing. In line with prior evidence suggesting an exaggerated response to the HIT in monkeys  
417 with higher cortisol levels<sup>89</sup>, we show a negative correlation between *FKBP5* methylation at  
418 month 6 and anxiety-like behavior during the 'alone' condition as well as anxiety and locomotion  
419 during the 'profile' condition. This suggests increased overall anxiety and locomotion in  
420 individuals with reduced *FKBP5* DNA methylation, which is in agreement with the hypotheses

421 that lower *FKBP5* methylation, would lead to higher cortisol levels during a stressful task.

422

423 Several human studies support a role for *FKBP5* DNA demethylation in response to ELS  
424 <sup>35,42,78-80</sup>. Importantly, a study in survivors of the Holocaust suggested additional intergenerational  
425 effects of trauma exposure on *FKBP5* DNA methylation in the offspring <sup>26</sup>. The Holocaust-  
426 exposed parental generation showed increased DNA methylation whereas the offspring  
427 generation showed decreased *FKBP5* DNA methylation levels in and around the orthologous  
428 intron 7 GREs <sup>26</sup>. In addition, lower levels of DNA methylation were negatively correlated with  
429 cortisol awakening response, which in general is in line with our observations. As mentioned  
430 before, human studies investigating such phenomena are incredibly difficult to control and not  
431 surprisingly provoke strong excitement and controversy at the same time. Similar to human  
432 studies, as yet we are unable to provide mechanistic insight to the phenomena we report in this  
433 study with NHPs at the moment. However, we emphasize that the infant maltreatment model in  
434 rhesus monkeys used in this study is highly translational, and well-controlled, thus providing  
435 cross-species supportive evidence for intergenerational effects of maltreatment in childhood, one  
436 of the most critical risk factors for psychiatric disorders. This model is optimally suited for further  
437 understanding of mechanisms of intergenerational transmission of information in primates.

438

439 Overall, our data suggest a role for intergenerational programming of epigenetic patterns  
440 in response to childhood maltreatment in primates, independent of behavioral transmission. The  
441 observed differences in *FKBP5* methylation show functional effects on HPA axis activity and  
442 behavioral outcomes. Thus, childhood maltreatment in primates may induce molecular and  
443 behavioral changes in a subsequent generation leading to a higher risk for disease across  
444 generations.

445

## 446 **Methods**

447

448 **Subjects and Experimental Groups:** We used a unique and innovative cross-fostering design  
449 with random assignment to experimental group at birth. To investigate the contribution of  
450 ancestral maltreatment history on the next generation *FKBP5* methylation and related  
451 neuroendocrine and behavioral phenotypes, we focused on infants born to maltreated (MALT) or  
452 control (CTRL) biological mothers that were randomly assigned and cross-fostered at birth to  
453 control foster mothers with a history of nurturing maternal care (CTRL) following previous  
454 protocols <sup>58</sup>, thus creating two separate groups: CTRL-to-CTRL and MALT-to-CTRL (**Figure 1**).  
455 Thus, we are able to ask specifically how maltreatment in the biological mothers influences

456 offspring outcomes eliminating the possibility of behavioral effects from the biological mother  
457 towards the offspring, including variations in maternal care, as offspring grew up in a control  
458 environment different from the biological mother. A total of N=20 infant rhesus monkeys  
459 (*Macaca mulatta*), 9 males and 11 females, and their biological and foster mothers, served as  
460 subjects for the proposed studies, with 11 infants assigned at birth to the CTRL-to-CTRL group  
461 (6 males, 5 females), and the remaining 9 infants assigned to the MALT-to-CTRL group (3  
462 males, 6 females). (**Table 1, Figure 1**). Biological and behavioral data were collected  
463 longitudinally in the offspring from birth to 24 months of age (juvenile, prepubertal period). All  
464 subjects lived with their foster mothers and families in large, complex, social groups maintained  
465 at Emory University's Yerkes National Primate Research Center (YNPRC) Field Station in  
466 Lawrenceville, GA. These social groups consisted of 75-150 adult females, their sub-adult and  
467 juvenile offspring and 2-3 adult males, and allowed us to counterbalance our experimental  
468 groups for sex, social dominance rank (high, medium and low social status), maternal  
469 parity/gravity/age, and to select subjects from different matrilineages (i.e. to be genetically  
470 unrelated). Animals were housed in 100ftx100ft compounds with access to climate controlled  
471 indoor areas. Standard nutrition (Purina Mills Int., Lab Diets, St. Louis, MO) and seasonal fruits  
472 and vegetables were provided twice daily with water access *ad libitum*. All procedures were in  
473 accordance with the Animal Welfare Act and the US Department of Health and Human Services  
474 "Guide for the Care of Laboratory Animals" and approved by the Emory University Institutional  
475 Animal Care and Use Committee (IACUC).

476  
477 **Behavioral characterization of maternal care:** Maternal care is a stable and consistent trait  
478 across generations with abusive behavior transmitted from mothers to daughters, resulting in  
479 maternal lineages showing infant maltreatment or competent maternal care, respectively <sup>45,90</sup>.  
480 We study these lineages in our colony for several years. We selected the CTRL and MALT  
481 biological mothers based on their consistent maternal behavior towards previous offspring as  
482 described in detail below. In order to characterize their own exposure to maltreatment, we  
483 tracked direct experimental observations by our lab and colony records to confirm that the  
484 biological MALT mothers were maltreated themselves as infants. This was available for 6 out of  
485 9 biological MALT mothers. Based on the consistency of maltreatment across generations, the  
486 remaining 3 biological MALT mothers were defined as maltreated based on the consistent  
487 maltreating phenotypes of their mothers. The absence of any records of maltreatment towards  
488 the CTRL biological mothers defined the CTRL biological mothers who themselves did not have  
489 any records of maltreatment towards previous offspring. All foster mothers in this study were  
490 selected based on their consistent competent maternal care towards prior offspring, which was

491 confirmed through direct observations of their maternal behavior towards fostered infants. A  
492 detailed description of the behavioral characterization of competent maternal care (CTRL) in  
493 contrast to infant MALT is provided in previous publications<sup>45,48,53,55,58,91</sup>. Briefly, focal  
494 observations of maternal care are performed over the first 3 months of the infants life (30 min  
495 long observation on separate days: 5 days/week during month 1, 2 days per week on month 2  
496 and 1 day/week during month 3, for a total of 16 hours. This observation protocol is optimal to  
497 document early maternal care in this species, particularly given that physical abuse is the  
498 highest during month. Competent maternal care (CTRL) was defined as typical behaviors such  
499 as nursing, cradling, grooming ventral contact and protection of the infant. Maltreatment (MALT)  
500 was defined as the comorbid occurrence of physical abuse (operationalized as violent behaviors  
501 directed towards the infant that cause pain and distress, including dragging, crushing, throwing)  
502 and infant rejection (i.e. prevention of nipple/ventral contact and pushing the infant away)  
503 resulting in high levels of infant distress<sup>45,52-55</sup>.

504  
505 **DNA collection:** Genomic DNA for *FKBP5* DNA methylation analysis was obtained from whole  
506 blood consistently collected during the morning hours in EDTA tubes (Sarstedt, Newton, NC) at  
507 the following time points during development: Day 2, Day 14 (Week 2), Day 30 (Month 1), Day  
508 90 (Month 3), Day 180 (Month 6), Day 720 (Month 24). DNA was extracted using standard  
509 procedures. We also obtained DNA samples from all biological mothers (N=20).

510  
511 ***FKBP5* DNA methylation analysis:** Based on our previous work on human *FKBP5*, we adapted  
512 the rhesus *FKBP5* DNA methylation assay from our human assays interrogating DNA  
513 methylation in and around functional glucocorticoid response elements (GREs) in intron 7 of  
514 *FKBP5*<sup>42</sup>. We interrogated 6 CpG dinucleotides that are orthologous to the human CpGs  
515 investigated before. Briefly, at Varionostic GmbH (Ulm, Germany) genomic DNA was bisulfite  
516 converted using the EZ-96 DNA Methylation Kit (Zymo, Irvine, CA). Amplicons, 476bp in length  
517 were generated from bisulfite converted DNA using primer P1\_F 5'-  
518 aggaagagagGTTGTTTTTGG AATTT AAGGTAATTG-3' and P1\_R 5'-  
519 cagtaatcagactcactatagggagaaggctTCTCTTACCTCCA AACTACTACTAAAA-3'. PCR reactions  
520 contained 10x buffer, HotStarTaq, MM, containing 1,5 mmol Mg<sup>2+</sup>, dNTPs (Qiagen, Hilden,  
521 Germany) (5ul), 5 μM Forward primer (0.5ul) 5 μM Reverse primer (0.5ul), Bisulfite DNA (1ul),  
522 H<sub>2</sub>O (3ul). PCR cycling conditions were [95C-15'00", 49x (95C-40", 58C-40", 72C-40"), 72C-  
523 5'00", 4C]. Amplicons were then analyzed on the Sequenom EpiTYPER platform in accordance  
524 with the manufacturers recommendations and included control standards and non-template  
525 control (please see **Supplemental Figure 1** for rhesus *FKBP5* intron 7 assay in comparison to

526 the human intron 7 assay).

527

528 **Enzyme-linked immunosorbent assay (ELISA):** To test the influence of DNA methylation  
529 within the GR binding site in intron 7 on the binding capabilities of GR to the putative GRE, we  
530 performed a competitive binding enzyme-linked immunosorbent assay using the TransAM GR kit  
531 (catalog no. 45496; Active Motif, Carlsbad, CA). To each microwell coated with canonical GRE  
532 sequence oligonucleotides, we added dexamethasone-treated HeLa nuclear extract (5 µg;  
533 Active Motif) and 40 pmol of one of four double-stranded oligo DNAs (two  
534 competing/experimental sequences plus a negative and positive control). All assays were  
535 performed in triplicate. Individual oligos and nuclear extract were added to each microwell and  
536 incubated for 1 h. Next, the primary antibody (GR 1:1000) and then secondary antibody  
537 (horseradish peroxidase (HRP) - conjugated IgG; 1:1000) was added for 1 h each. After several  
538 rinses, a colorimetric reaction to horseradish peroxidase was initiated and stopped after  
539 7minutes. Absorbance was measured at a wavelength of 450 nm and 655 nm to determine  
540 binding efficiencies. Low absorbance indicates a strong binding of the competitive oligo to the  
541 GR and thus a reduction of available GR for detection via antibody binding and HRP-based color  
542 change. Vice versa, a high absorbance indicates a less efficient binding of the competitive oligo  
543 to the GR that hence binds to the consensus GRE sequences immobilized on the plate, leading  
544 to a strong calorimetric signal. Antibodies, positive/negative controls and other reagents were  
545 provided in the TransAM GR kit. Custom methylated primer sequences: mGRE-fwd 5'-  
546 TCCTGTGAAGGGTACAATC/iMe-dC/GTTCAGCTCTGAAA-3' and mGRE-rev 5'-  
547 TTTTCAGAGCTGAA/iMe-dC/GGATTGTACCCTTCACAGGA-3'. Custom unmethylated primer  
548 sequences: GRE-fwd 5'-TCCTGTGAAGGGTACAATCCGTTTCAGCTCTGAAA-3' and GRE-rev  
549 5'-TTTTCAGAGCTGAACGGATTGTACCCTTCACAGGA-3' (all IDT Technologies).

550

551 **Behavioral Data:** Emotional reactivity of the offspring to varying degrees of threat was  
552 examined at 6 months of age during the Human Intruder Test (HIT; <sup>76</sup>). On the testing day, the  
553 trained mother-infant pairs were accessed in their home compound and the infant transported to  
554 a novel testing room and placed alone in a testing cage with one side made of clear plexiglass to  
555 allow video recording following published procedures <sup>57,58</sup>. The HIT is widely used to assess  
556 emotional reactivity (including fearful, anxious and aggressive behaviors) to an unfamiliar human  
557 in rhesus monkeys under three different and consecutive conditions, 10 min each, that pose an  
558 increasing degree of threat: 1) 'Alone' condition (no human intruder), which elicits "calling"  
559 vocalizations (coos), locomotion and exploration aimed to escape; 2) next, an unfamiliar human  
560 intruder entered the room and stood 3m from the cage presenting his/her profile to the subject



561 without direct eye contact ('profile' condition), which poses an uncertain threat that results in  
562 behavioral inhibition (freezing behavior), stop of vocalizations and vigilance; and 3) direct eye  
563 contact of the intruder with the monkey ('stare' condition), which is a threatening behavior for  
564 these animals, which typically stop freezing and respond with aggressive and submissive  
565 behaviors and threat vocalization towards the intruder. Immediately following the 30 min HIT, the  
566 infants were reunited with their mothers and returned to their social groups. All sessions were  
567 video recorded and later scored by two trained coders (inter-rater reliability of >90% agreement)  
568 using The Observer XT software (v10.5, Noldus, Inc., Netherlands) and published ethograms  
569 and procedures<sup>57,58</sup>. For this study, we focused on the analysis of anxiety, freezing, cooing and  
570 locomotion behaviors in line with the role of *FKBP5* and the HPA axis in these behaviors.

571  
572 **Hair Cortisol:** Hair cortisol data were obtained as described before<sup>55,85</sup>. Briefly, approximately  
573 one square inch area of hair was shaved from the nuchal area of the head on postnatal day 2  
574 after birth (to measure cortisol accumulated in hair *prenatally*) and at month 6 (to measure  
575 cortisol accumulated in hair that grew between birth and 6 months). The hair was weighed,  
576 washed with isopropanol, ground to fine powder and extracted with methanol overnight. After  
577 methanol evaporation, the residue was re-dissolved in assay buffer and cortisol was determined  
578 using the cortisol ELISA kit (Salimetrics, #1-3002; Carlsbad, CA). Intra- and inter-assay  
579 coefficients of variation were <10%.

580  
581 **Morning Plasma Cortisol:** Procedures for collection of morning basal blood samples have been  
582 described before<sup>67,90</sup>. Blood samples were collected at the same ages as hair cortisol (postnatal  
583 day 2, and 6 months) in EDTA tubes and immediately placed on ice. Plasma was separated by  
584 centrifugation at 1,000g for 10 min at 4°C and then aliquoted and stored at -80°C until assayed.  
585 Plasma concentrations of cortisol were assayed by ultra-performance liquid chromatography  
586 electrospray ionization (UPLC-ESI) tandem mass spectrometry in duplicates by the YNPRC  
587 Biomarkers Core, following published methods<sup>92</sup>.

588  
589 **Data Analyses:** Demographic and descriptive data on the sample are given in **Table 1**  
590 separated for biological MALT and CTRL groups. Groups show a balanced design with respect  
591 to major potential confounding variables (e.g. maternal age, parity, social rank, offspring sex).  
592 Between group differences for demographic variables in **Table 1** were determined using  
593 independent samples t-tests or chi-square tests. A simple linear mixed effects model was used  
594 to investigate differences between ancestral groups (MALT and CTRL), in terms of the offspring  
595 overall mean *FKBP5* DNA methylation levels across all time points (day 2, week 2, month 1,

596 month 3, month 6 and month 24); this comparison of means is very similar to a comparison of  
597 the area under the curve (AUC approach). *FKBP5* DNA methylation was set as the dependent  
598 variable with 6 repeated measures over time; group (MALT, CTRL) was included as a fixed  
599 effect and was the effect of primary interest. To account for correlation among the 6 repeated  
600 measures and possibly heterogeneous variability over time, the model incorporated a random  
601 effect for individual (subject) and separate error variances at the 6 time points. Given our  
602 balanced study design with regard to potential confounding factors (biological and foster mother  
603 age, rank, parity, gravity; offspring sex), we did not include these variables in the final model,  
604 although we first ran preliminary analyses where each of them were separately tested in the  
605 model to ensure that they had, indeed, no major influence on the results of the analysis. Linear  
606 correlations between variables were performed using Spearman's rank correlation or Pearson's  
607 product-moment correlation (two-sided). All analyses were performed in SPSS 24. We used the  
608 Shapiro-Wilk Test to confirm normality and log transformed data that deviated from normal  
609 distribution. Significance was determined as  $p < 0.05$ . Correction for multiple testing according to  
610 Bonferroni was applied for the number of CpGs tested.

611

612

### 613 **Acknowledgments**

614

615 This work was supported by the following sources of funding: the National Institute of Mental  
616 Health (P50 MH078105 and MH086203 to BRH), the National Institute on Drug Abuse (R01  
617 DA038588-01 to MMS), the Eunice Kennedy Shriver National Institute of Child Health and  
618 Human Development (R21 HD088931-01A1 to MMS, KR and TK) the Brain & Behavior  
619 Research Foundation (NARSAD YI 20895 to TK), EMBO (EMBO ALTF 1153-2013 to TK) and  
620 Office of Research Infrastructure Programs/OD Grant OD11132 (Yerkes National Primate  
621 Research Center –YNPRC- Base Grant, formerly RR000165). The authors thank Anne Glenn,  
622 Christine Marsteller, Zach Johnson and the staff at the YNPRC for the excellent technical  
623 support and animal care provided during the studies. The YNPRC is fully accredited by  
624 AAALAC, International.

625

626

627

628 Author contributions: TK, KJR and MMS designed research; TK, EM, BRH, SB, DG, JSM and  
629 MMS performed research; TK, EM, BRH, DG, KJR and MMS analyzed data; and TK and MMS  
630 wrote the paper. All authors commented and approved the paper.



632 **References**

- 633
- 634 1 Teicher, M. H. *et al.* The neurobiological consequences of early stress and childhood  
635 maltreatment. *Neurosci.Biobehav.Rev.* **27**, 33-44 (2003).
- 636 2 Gilbert, R. *et al.* Burden and consequences of child maltreatment in high-income  
637 countries. *Lancet* **373**, 68-81, doi:10.1016/s0140-6736(08)61706-7 (2009).
- 638 3 Burton, T. & Metcalfe, N. B. Can environmental conditions experienced in early life  
639 influence future generations? *Proceedings of the Royal Society B: Biological Sciences*  
640 **281** (2014).
- 641 4 Bale, T. L. Epigenetic and transgenerational reprogramming of brain development. *Nat*  
642 *Rev Neurosci* **16**, 332-344, doi:10.1038/nrn3818 (2015).
- 643 5 Szyf, M. Nongenetic inheritance and transgenerational epigenetics. *Trends in Molecular*  
644 *Medicine* **21**, 134-144, doi:<https://doi.org/10.1016/j.molmed.2014.12.004> (2015).
- 645 6 Bock, J., Wainstock, T., Braun, K. & Segal, M. Stress In Utero: Prenatal Programming of  
646 Brain Plasticity and Cognition. *Biological psychiatry* **78**, 315-326,  
647 doi:10.1016/j.biopsych.2015.02.036 (2015).
- 648 7 Kapoor, A., Dunn, E., Kostaki, A., Andrews, M. H. & Matthews, S. G. Fetal programming  
649 of hypothalamo-pituitary-adrenal function: prenatal stress and glucocorticoids. *The*  
650 *Journal of Physiology* **572**, 31-44, doi:10.1113/jphysiol.2006.105254 (2006).
- 651 8 Drake, A. & Walker, B. The intergenerational effects of fetal programming: non-genomic  
652 mechanisms for the inheritance of low birth weight and cardiovascular risk. *Journal of*  
653 *Endocrinology* **180**, 1-16, doi:10.1677/joe.0.1800001 (2004).
- 654 9 Meaney, M. J. Maternal Care, Gene Expression, and the Transmission of Individual  
655 Differences in Stress Reactivity Across Generations. *Annual Review of Neuroscience* **24**,  
656 1161-1192, doi:10.1146/annurev.neuro.24.1.1161 (2001).
- 657 10 Guerrero-Bosagna, C. & Skinner, M. K. Environmentally induced epigenetic  
658 transgenerational inheritance of phenotype and disease. *Mol Cell Endocrinol* **354**, 3-8,  
659 doi:10.1016/j.mce.2011.10.004 (2012).
- 660 11 Vassoler, F. M., White, S. L., Schmidt, H. D., Sadri-Vakili, G. & Pierce, R. C. Epigenetic  
661 inheritance of a cocaine-resistance phenotype. *Nat Neurosci* **16**, 42-47,  
662 doi:10.1038/nn.3280 (2013).
- 663 12 Skinner, M. K., Manikkam, M. & Guerrero-Bosagna, C. Epigenetic transgenerational  
664 actions of environmental factors in disease etiology. *Trends in Endocrinology and*  
665 *Metabolism* **21**, 214-222, doi:10.1016/j.tem.2009.12.007 (2010).
- 666 13 Gapp, K. *et al.* Implication of sperm RNAs in transgenerational inheritance of the effects

- 667 of early trauma in mice. *Nat Neurosci* **17**, 667-669, doi:10.1038/nn.3695 (2014).
- 668 14 Rodgers, A. B., Morgan, C. P., Bronson, S. L., Revello, S. & Bale, T. L. Paternal stress  
669 exposure alters sperm microRNA content and reprograms offspring HPA stress axis  
670 regulation. *J Neurosci* **33**, 9003-9012, doi:10.1523/jneurosci.0914-13.2013 (2013).
- 671 15 Dias, B. G. & Ressler, K. J. Parental olfactory experience influences behavior and neural  
672 structure in subsequent generations. *Nat Neurosci* **17**, 89-96, doi:10.1038/nn.3594  
673 (2014).
- 674 16 Horsthemke, B. A critical view on transgenerational epigenetic inheritance in humans.  
675 *Nature communications* **9**, 2973, doi:10.1038/s41467-018-05445-5 (2018).
- 676 17 Radtke, K. M. *et al.* Transgenerational impact of intimate partner violence on methylation  
677 in the promoter of the glucocorticoid receptor. *Transl Psychiatry* **1**, e21,  
678 doi:10.1038/tp.2011.21 (2011).
- 679 18 Bowers, M. E. & Yehuda, R. Intergenerational Transmission of Stress in Humans.  
680 *Neuropsychopharmacology : official publication of the American College of*  
681 *Neuropsychopharmacology*, doi:10.1038/npp.2015.247 (2015).
- 682 19 Cao-Lei, L. *et al.* DNA methylation signatures triggered by prenatal maternal stress  
683 exposure to a natural disaster: Project Ice Storm. *PloS one* **9**, e107653,  
684 doi:10.1371/journal.pone.0107653 (2014).
- 685 20 Perroud, N. *et al.* The Tutsi genocide and transgenerational transmission of maternal  
686 stress: epigenetics and biology of the HPA axis. *World J Biol Psychiatry* **15**, 334-345,  
687 doi:10.3109/15622975.2013.866693 (2014).
- 688 21 Moog, N. K. *et al.* Intergenerational Effect of Maternal Exposure to Childhood  
689 Maltreatment on Newborn Brain Anatomy. *Biological psychiatry* **83**, 120-127,  
690 doi:10.1016/j.biopsych.2017.07.009 (2018).
- 691 22 Santavirta, T., Santavirta, N. & Gilman, S. E. Association of the World War II Finnish  
692 Evacuation of Children With Psychiatric Hospitalization in the Next Generation. *JAMA*  
693 *psychiatry*, doi:10.1001/jamapsychiatry.2017.3511 (2017).
- 694 23 Lehrner, A. *et al.* Maternal PTSD associates with greater glucocorticoid sensitivity in  
695 offspring of Holocaust survivors. *Psychoneuroendocrinology* **40**, 213-220,  
696 doi:10.1016/j.psyneuen.2013.11.019 (2014).
- 697 24 Collishaw, S., Dunn, J., O'Connor, T. G. & Golding, J. Maternal childhood abuse and  
698 offspring adjustment over time. *Development and psychopathology* **19**, 367-383,  
699 doi:10.1017/s0954579407070186 (2007).
- 700 25 Roberts, A. L., Lyall, K., Rich-Edwards, J. W., Ascherio, A. & Weisskopf, M. G.  
701 Association of maternal exposure to childhood abuse with elevated risk for autism in

- 702 offspring. *JAMA psychiatry* **70**, 508-515, doi:10.1001/jamapsychiatry.2013.447 (2013).
- 703 26 Yehuda, R. *et al.* Holocaust Exposure Induced Intergenerational Effects on FKBP5  
704 Methylation. *Biological psychiatry* **80**, 372-380, doi:10.1016/j.biopsych.2015.08.005  
705 (2016).
- 706 27 Weaver, I. C. *et al.* Epigenetic programming by maternal behavior. *Nat.Neurosci.* **7**, 847-  
707 854 (2004).
- 708 28 McGowan, P. O. *et al.* Epigenetic regulation of the glucocorticoid receptor in human brain  
709 associates with childhood abuse. *Nat.Neurosci.* **12**, 342-348 (2009).
- 710 29 Heim, C., Newport, D. J., Mletzko, T., Miller, A. H. & Nemeroff, C. B. The link between  
711 childhood trauma and depression: insights from HPA axis studies in humans.  
712 *Psychoneuroendocrinology* **33**, 693-710 (2008).
- 713 30 Drury, S. S., Sanchez, M. M. & Gonzalez, A. When mothering goes awry: Challenges  
714 and opportunities for utilizing evidence across rodent, nonhuman primate and human  
715 studies to better define the biological consequences of negative early caregiving.  
716 *Hormones and behavior* **77**, 182-192, doi:10.1016/j.yhbeh.2015.10.007 (2016).
- 717 31 Lappalainen, T. & Grealley, J. M. Associating cellular epigenetic models with human  
718 phenotypes. *Nature Reviews Genetics* **18**, 441, doi:10.1038/nrg.2017.32 (2017).
- 719 32 Meaney, M. J. & Szyf, M. Environmental programming of stress responses through DNA  
720 methylation: life at the interface between a dynamic environment and a fixed genome.  
721 *Dialogues in Clinical Neuroscience* **7**, 103-123 (2005).
- 722 33 Heard, E. & Martienssen, R. A. Transgenerational Epigenetic Inheritance: myths and  
723 mechanisms. *Cell* **157**, 95-109, doi:10.1016/j.cell.2014.02.045 (2014).
- 724 34 Zannas, A. S. & Binder, E. B. Gene-environment interactions at the FKBP5 locus:  
725 sensitive periods, mechanisms and pleiotropism. *Genes Brain and Behavior* **13**, 25-37,  
726 doi:10.1111/gbb.12104 (2014).
- 727 35 Tyrka, A. R. *et al.* Childhood maltreatment and methylation of FK506 binding protein 5  
728 gene (FKBP5). *Development and psychopathology* **27**, 1637-1645,  
729 doi:10.1017/s0954579415000991 (2015).
- 730 36 Mehta, D. *et al.* Using Polymorphisms in FKBP5 to Define Biologically Distinct Subtypes  
731 of Posttraumatic Stress Disorder Evidence From Endocrine and Gene Expression  
732 Studies. *Archives of general psychiatry* **68**, 901-910,  
733 doi:10.1001/archgenpsychiatry.2011.50 (2011).
- 734 37 Jaaskelainen, T., Makkonen, H. & Palvimo, J. J. Steroid up-regulation of FKBP51 and its  
735 role in hormone signaling 4. *Curr.Opin.Pharmacol.* **11**, 326-331 (2011).
- 736 38 Ising, M. *et al.* Polymorphisms in the FKBP5 gene region modulate recovery from

- 737 psychosocial stress in healthy controls. *Eur.J.Neurosci.* **28**, 389-398 (2008).
- 738 39 Binder, E. B. *et al.* Association of FKBP5 polymorphisms and childhood abuse with risk  
739 of posttraumatic stress disorder symptoms in adults. *Jama* **299**, 1291-1305 (2008).
- 740 40 Bevilacqua, L. *et al.* Interaction between FKBP5 and childhood trauma and risk of  
741 aggressive behavior 1 214. *Arch.Gen.Psychiatry* **69**, 62-70 (2012).
- 742 41 Appel, K. *et al.* Moderation of Adult Depression by a Polymorphism in the FKBP5 Gene  
743 and Childhood Physical Abuse in the General Population. *Neuropsychopharmacology :  
744 official publication of the American College of Neuropsychopharmacology* (2011).
- 745 42 Klengel, T. *et al.* Allele-specific FKBP5 DNA demethylation mediates gene-childhood  
746 trauma interactions. *Nature Neuroscience* **16**, 33-41, doi:10.1038/nn.3275 (2013).
- 747 43 Klengel, T. & Binder, E. B. Epigenetics of Stress-Related Psychiatric Disorders and Gene  
748 x Environment Interactions. *Neuron* **86**, 1343-1357, doi:10.1016/j.neuron.2015.05.036  
749 (2015).
- 750 44 Fairbanks, L. A. in *Advances in the Study of Behavior* Vol. 25 579-611 (1996).
- 751 45 Maestriperri, D. & Carroll, K. A. Risk factors for infant abuse and neglect in group-living  
752 rhesus monkeys. *Psychological Science* **9**, 143-145 (1998).
- 753 46 Sanchez, M. M., McCormack, K. M. & Howell, B. R. Social buffering of stress responses  
754 in nonhuman primates: Maternal regulation of the development of emotional regulatory  
755 brain circuits. *Social neuroscience* **10**, 512-526, doi:10.1080/17470919.2015.1087426  
756 (2015).
- 757 47 Brent, L., Koban, T. & Ramirez, S. Abnormal, abusive, and stress-related behaviors in  
758 baboon mothers. *Biological psychiatry* **52**, 1047-1056 (2002).
- 759 48 Maestriperri, D. Parenting styles of abusive mothers in group-living rhesus macaques.  
760 *Animal behaviour* **55**, 1-11 (1998).
- 761 49 Maestriperri, D. The biology of human parenting: insights from nonhuman primates.  
762 *Neuroscience and biobehavioral reviews* **23**, 411-422 (1999).
- 763 50 Johnson, E. O., Kamilaris, T. C., Calogero, A. E., Gold, P. W. & Chrousos, G. P. Effects  
764 of early parenting on growth and development in a small primate. *Pediatric research* **39**,  
765 999-1005, doi:10.1203/00006450-199606000-00012 (1996).
- 766 51 Troisi, A., D'Amato, F. R., Fuccillo, R. & Scucchi, S. Infant abuse by a wild-born group-  
767 living Japanese macaque mother. *Journal of abnormal psychology* **91**, 451-456 (1982).
- 768 52 Howell, B. R. *et al.* Brain white matter microstructure alterations in adolescent rhesus  
769 monkeys exposed to early life stress: associations with high cortisol during infancy.  
770 *Biology of mood & anxiety disorders* **3**, 21, doi:10.1186/2045-5380-3-21 (2013).
- 771 53 McCormack, K., Sanchez, M. M., Bardi, M. & Maestriperri, D. Maternal care patterns and

- 772 behavioral development of rhesus macaque abused infants in the first 6 months of life.  
773 *Developmental psychobiology* **48**, 537-550, doi:10.1002/dev.20157 (2006).
- 774 54 Sanchez, M. M. The impact of early adverse care on HPA axis development: nonhuman  
775 primate models. *Horm Behav* **50**, 623-631, doi:S0018-506X(06)00147-4 [pii]  
776 10.1016/j.yhbeh.2006.06.012 (2006).
- 777 55 Drury, S. S. *et al.* Shaping long-term primate development: Telomere length trajectory as  
778 an indicator of early maternal maltreatment and predictor of future physiologic regulation.  
779 *Development and psychopathology* **29**, 1539-1551, doi:10.1017/s0954579417001225  
780 (2017).
- 781 56 Howell, B. R. *et al.* Social subordination stress and serotonin transporter polymorphisms:  
782 associations with brain white matter tract integrity and behavior in juvenile female  
783 macaques. *Cerebral cortex (New York, N.Y. : 1991)* **24**, 3334-3349,  
784 doi:10.1093/cercor/bht187 (2014).
- 785 57 Howell, B. R. *et al.* Early adverse experience increases emotional reactivity in juvenile  
786 rhesus macaques: relation to amygdala volume. *Developmental psychobiology* **56**, 1735-  
787 1746, doi:10.1002/dev.21237 (2014).
- 788 58 Howell, B. R. *et al.* Maternal buffering beyond glucocorticoids: impact of early life stress  
789 on corticolimbic circuits that control infant responses to novelty. *Social neuroscience* **12**,  
790 50-64, doi:10.1080/17470919.2016.1200481 (2017).
- 791 59 Maestripieri, D. Early experience affects the intergenerational transmission of infant  
792 abuse in rhesus monkeys. *Proceedings of the National Academy of Sciences of the*  
793 *United States of America* **102**, 9726-9729, doi:10.1073/pnas.0504122102 (2005).
- 794 60 Widom, C. S., Czaja, S. J. & DuMont, K. A. Intergenerational transmission of child abuse  
795 and neglect: Real or detection bias? *Science (New York, N.Y.)* **347**, 1480 (2015).
- 796 61 Kinnally, E. L. & Capitanio, J. P. Paternal early experiences influence infant development  
797 through non-social mechanisms in Rhesus Macaques. *Frontiers in Zoology* **12**, S14-S14,  
798 doi:10.1186/1742-9994-12-S1-S14 (2015).
- 799 62 Kinnally, E. L. *et al.* Transgenerational Effects of Early Variable Foraging Demand Stress  
800 in Female Bonnet Macaques. *American journal of primatology* **75**, 509-517,  
801 doi:10.1002/ajp.22130 (2013).
- 802 63 Fairbanks, L. A. Early experience and cross-generational continuity of mother-infant  
803 contact in vervet monkeys. *Developmental psychobiology* **22**, 669-681,  
804 doi:10.1002/dev.420220703 (1989).
- 805 64 Kinnally, E. L., Gonzalez, M. N. & Capitanio, J. P. Paternal line effects of early  
806 experiences persist across three generations in rhesus macaques. *Developmental*



- 807 *psychobiology*, doi:10.1002/dev.21771 (2018).
- 808 65 Maestripieri, D., Lindell, S. G. & Higley, J. D. Intergenerational transmission of maternal  
809 behavior in rhesus macaques and its underlying mechanisms. *Developmental*  
810 *psychobiology* **49**, 165-171, doi:10.1002/dev.20200 (2007).
- 811 66 Gunnar, M. R., Wewerka, S., Frenn, K., Long, J. D. & Griggs, C. Developmental changes  
812 in hypothalamus–pituitary–adrenal activity over the transition to adolescence: Normative  
813 changes and associations with puberty. *Development and psychopathology* **21**, 69-85,  
814 doi:10.1017/S0954579409000054 (2009).
- 815 67 Koch, H., McCormack, K., Sanchez, M. M. & Maestripieri, D. The development of the  
816 hypothalamic-pituitary-adrenal axis in rhesus monkeys: effects of age, sex, and early  
817 experience. *Developmental psychobiology* **56**, 86-95, doi:10.1002/dev.21093 (2014).
- 818 68 Kapoor, A., Lubach, G. R., Ziegler, T. E. & Coe, C. L. Hormone levels in neonatal hair  
819 reflect prior maternal stress exposure during pregnancy. *Psychoneuroendocrinology* **66**,  
820 111-117, doi:10.1016/j.psyneuen.2016.01.010 (2016).
- 821 69 Stalder, T. & Kirschbaum, C. Analysis of cortisol in hair – State of the art and future  
822 directions. *Brain, Behavior, and Immunity* **26**, 1019-1029,  
823 doi:<https://doi.org/10.1016/j.bbi.2012.02.002> (2012).
- 824 70 Provencal, N. *et al.* The signature of maternal rearing in the methylome in rhesus  
825 macaque prefrontal cortex and T cells. *J Neurosci* **32**, 15626-15642,  
826 doi:10.1523/jneurosci.1470-12.2012 (2012).
- 827 71 Teicher, M. H., Samson, J. A., Anderson, C. M. & Ohashi, K. The effects of childhood  
828 maltreatment on brain structure, function and connectivity. *Nature Reviews Neuroscience*  
829 **17**, 652, doi:10.1038/nrn.2016.111  
830 <https://www.nature.com/articles/nrn.2016.111-supplementary-information> (2016).
- 831 72 Nemeroff, C. B. Paradise Lost: The Neurobiological and Clinical Consequences of Child  
832 Abuse and Neglect. *Neuron* **89**, 892-909, doi:10.1016/j.neuron.2016.01.019 (2016).
- 833 73 Meyer, J. S. & Hamel, A. F. Models of Stress in Nonhuman Primates and Their  
834 Relevance for Human Psychopathology and Endocrine Dysfunction. *ILAR journal* **55**,  
835 347-360, doi:10.1093/ilar/ilu023 (2014).
- 836 74 Coplan, J. D. *et al.* Early life stress and macaque amygdala hypertrophy: preliminary  
837 evidence for a role for the serotonin transporter gene. *Frontiers in Behavioral*  
838 *Neuroscience* **8**, doi:10.3389/fnbeh.2014.00342 (2014).
- 839 75 Worlein, J. M. Nonhuman Primate Models of Depression: Effects of Early Experience and  
840 Stress. *ILAR journal* **55**, 259-273, doi:10.1093/ilar/ilu030 (2014).
- 841 76 Kalin, N. H. & Shelton, S. E. Defensive behaviors in infant rhesus monkeys:

- 842 environmental cues and neurochemical regulation. *Science (New York, N.Y.)* **243**, 1718-  
843 1721 (1989).
- 844 77 Lee, R. S. *et al.* Chronic corticosterone exposure increases expression and decreases  
845 deoxyribonucleic acid methylation of Fkbp5 in mice. *Endocrinology* **151**, 4332-4343  
846 (2010).
- 847 78 Harms, M. B. *et al.* Early life stress, FK506 binding protein 5 gene (FKBP5) methylation,  
848 and inhibition-related prefrontal function: A prospective longitudinal study. *Development*  
849 *and psychopathology* **29**, 1895-1903, doi:10.1017/s095457941700147x (2017).
- 850 79 Tozzi, L. *et al.* Epigenetic Changes of FKBP5 as a Link Connecting Genetic and  
851 Environmental Risk Factors with Structural and Functional Brain Changes in Major  
852 Depression. *Neuropsychopharmacology : official publication of the American College of*  
853 *Neuropsychopharmacology*, doi:10.1038/npp.2017.290 (2017).
- 854 80 Parade, S. H. *et al.* Change in FK506 binding protein 5 (FKBP5) methylation over time  
855 among preschoolers with adversity. *Development and psychopathology* **29**, 1627-1634,  
856 doi:10.1017/S0954579417001286 (2017).
- 857 81 Ewald, E. R. *et al.* Alterations in DNA methylation of Fkbp5 as a determinant of blood-  
858 brain correlation of glucocorticoid exposure. *Psychoneuroendocrinology* **44**, 112-122,  
859 doi:10.1016/j.psyneuen.2014.03.003 (2014).
- 860 82 Han, K. M. *et al.* Influence of FKBP5 polymorphism and DNA methylation on structural  
861 changes of the brain in major depressive disorder. *Sci Rep* **7**, 42621,  
862 doi:10.1038/srep42621 (2017).
- 863 83 Gillespie, C. F. *et al.* Trauma exposure and stress-related disorders in inner city primary  
864 care patients. *Gen Hosp Psychiatry*. **31**, doi:10.1016/j.genhosppsy.2009.05.003  
865 (2009).
- 866 84 Goldmann, E. *et al.* Pervasive exposure to violence and posttraumatic stress disorder in  
867 a predominantly African American Urban Community: The Detroit neighborhood health  
868 study. *Journal of Traumatic Stress* **24**, 747-751, doi:10.1002/jts.20705 (2011).
- 869 85 Meyer, J., Novak, M., Hamel, A. & Rosenberg, K. Extraction and analysis of cortisol from  
870 human and monkey hair. *Journal of visualized experiments : JoVE*, e50882,  
871 doi:10.3791/50882 (2014).
- 872 86 Winkler, B. K., Lehnert, H., Oster, H., Kirchner, H. & Harbeck, B. FKBP5 methylation as a  
873 possible marker for cortisol state and transient cortisol exposure in healthy human  
874 subjects. *Epigenomics* **9**, 1279-1286, doi:10.2217/epi-2017-0057 (2017).
- 875 87 Lee, R. S. *et al.* DNA methylation and sex-specific expression of FKBP5 as correlates of  
876 one-month bedtime cortisol levels in healthy individuals. *Psychoneuroendocrinology* **97**,

- 877 164-173, doi:<https://doi.org/10.1016/j.psyneuen.2018.07.003> (2018).
- 878 88 Ainsworth, M. D. & Bell, S. M. Attachment, exploration, and separation: illustrated by the  
879 behavior of one-year-olds in a strange situation. *Child development* **41**, 49-67 (1970).
- 880 89 Hamel, A. F. *et al.* Responses to the Human Intruder Test are related to hair cortisol  
881 phenotype and sex in rhesus macaques (*Macaca mulatta*). *American journal of*  
882 *primatology* **79**, 1-10, doi:10.1002/ajp.22526 (2017).
- 883 90 Sanchez, M. M. *et al.* Effects of sex and early maternal abuse on adrenocorticotropin  
884 hormone and cortisol responses to the corticotropin-releasing hormone challenge during  
885 the first 3 years of life in group-living rhesus monkeys. *Development and*  
886 *psychopathology* **22**, 45-53, doi:10.1017/s0954579409990253 (2010).
- 887 91 McCormack, K., Newman, T. K., Higley, J. D., Maestriperi, D. & Sanchez, M. M.  
888 Serotonin transporter gene variation, infant abuse, and responsiveness to stress in  
889 rhesus macaque mothers and infants. *Hormones and behavior* **55**, 538-547,  
890 doi:10.1016/j.yhbeh.2009.01.009 (2009).
- 891 92 Godfrey, J. R. *et al.* Diet matters: Glucocorticoid-related neuroadaptations associated  
892 with calorie intake in female rhesus monkeys. *Psychoneuroendocrinology* **91**, 169-178,  
893 doi:10.1016/j.psyneuen.2018.03.008 (2018).
- 894
- 895

896 **Supplementary Materials**

897

898 Supplementary Figures: S1-S3

899

900 **Figures and Figure Legends**

901

902 **Figure 1. Experimental overview.** In order to specifically investigate the effect of infant  
903 maltreatment in the ancestral generation, offspring from MALT and CTRL biological mothers  
904 were cross fostered after birth to CTRL foster mothers that provided competent care. We  
905 followed the offspring from birth to 24 months of life. EDTA blood was obtained at day 2, week 2,  
906 month 1, month 3, month 6, and month 24. Hair samples were obtained at day 2 and month 6. A  
907 human intruder test was performed at month 6.  
908

909

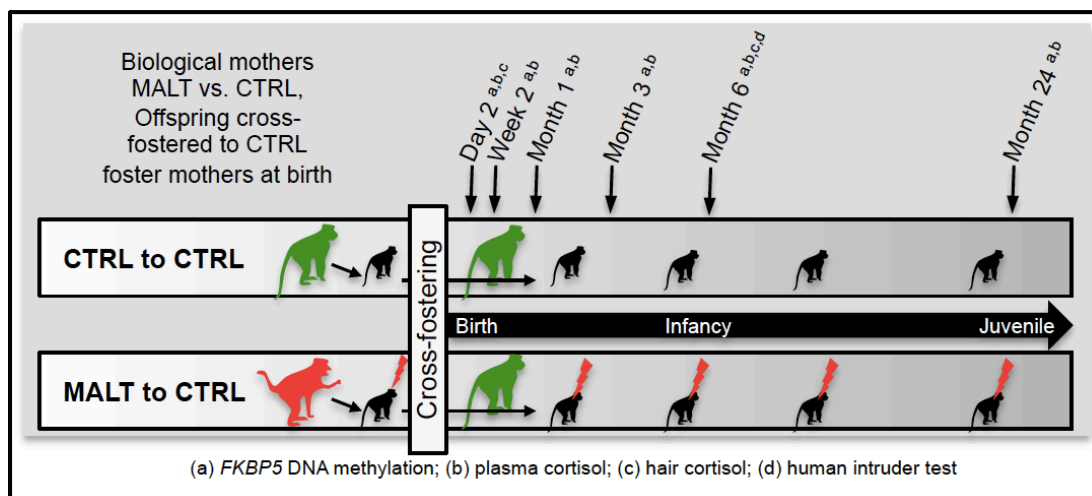

910

911

911 **Figure 2. Group-dependent *FKBP5* DNA methylation differences across development.**

912 DNA methylation at previously described CpGs in and around functional glucocorticoid response  
913 elements (GREs) was determined using the Sequenom EpiTYPER platform across all 6 time  
914 points. MALT offspring (N=9) compared to CTRL offspring (N=12) show lower DNA methylation  
915 at CpG5 ( $\beta=0.28$ ,  $SE=0.08$ ,  $p=0.003$ ,  $p_{\text{Bonferroni}}=0.018$ ). DNA methylation differences are  
916 pronounced between birth and month 6 and show a convergence at 2 years of age. Error bars  
917 indicate SEM.

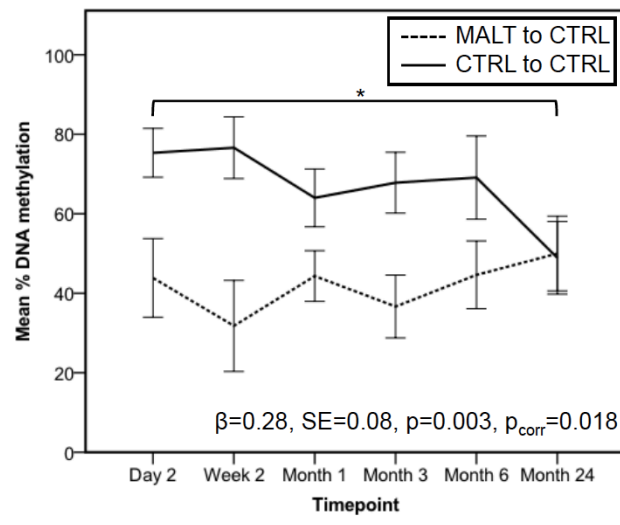

918

919

920 **Figure 3. GR binding to methylated and unmethylated GRE sequence.** To test the influence  
921 of DNA methylation within the GRE in intron 7 on GR binding, we performed a competitive  
922 binding enzyme-linked immunosorbent assay. A low absorbance indicates a strong binding of  
923 the competitive oligo to the GR and thus a reduction of available GR for detection via antibody  
924 binding and HRP-based color change. Vice versa, a high absorbance indicates a less efficient  
925 binding of the competitive oligo to the GR that hence binds to the consensus GRE sequences  
926 immobilized on the plate, leading to a strong calorimetric signal. The methylated CpG5 GRE is  
927 less efficient in binding the GR compared to the unmethylated oligonucleotide (Mean  
928 absorbance 450/655nm, unmethylated= $0.356 \pm 0.035$ , methylated= $0.476 \pm 0.046$ ,  $t(4)=-3.59$ ,  
929  $p=0.023$ ,  $N=3$ ) indicating that a reduction of DNA methylation within the GRE lead to a stronger  
930 GR binding to this enhancer element.

931

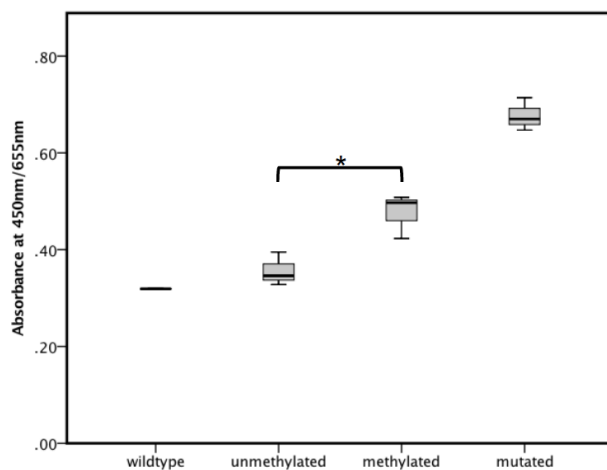

932

933

934 **Figure 4. Correlation Month 6 DNAm and Month 6 Hair Cortisol in MALT and CTRL.** A  
935 negative correlation between hair cortisol at 6 month and *FKBP5* DNA methylation was  
936 observed in MALT offspring ( $r(8)=-0.76$ ,  $p=0.031$ ), which is in line with previous reports providing  
937 evidence for a reduced *FKBP5* DNA methylation is leading to higher cortisol levels. In contrast,  
938 CTRL offspring showed a positive correlation between *FKBP5* DNA methylation and hair cortisol  
939 ( $r(8)=0.69$ ,  $p=0.06$ ). These data support the notion that *FKBP5* DNA methylation in MALT and  
940 CTRL offspring is influencing cortisol levels in opposite directions (Fisher z-score=-2.9,  $p=0.003$ )  
941 that may lead to functional differences in HPA axis activity under stressful conditions.  
942

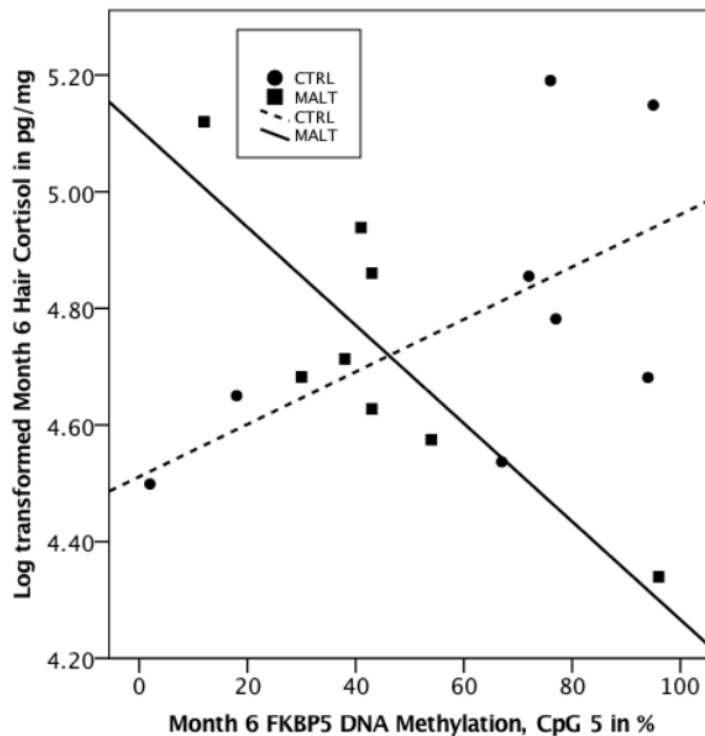

943  
944  
945 **Figure 5. Locomotion during HIT profile condition between MALT and CTRL.** (A) Boxplots  
946 showing a significant group difference for locomotion during the profile condition with MALT  
947 individuals showing increased locomotion compared to CTRL (log transformed mean %  
948 locomotion during 10 min observation period) (MALT:  $-2.42 \pm 0.65$ , CTRL:  $-6.82 \pm 3.86$ ,  $t(17)=-$   
949  $3.7$ ,  $p=0.004$ ). (B) A negative correlation was detected between *FKBP5* DNA methylation at  
950 month 6 and anxiety during the alone condition ( $r(17)=-0.53$ ,  $p=0.03$ ), and anxiety and  
951 locomotion during the profile condition ( $r(17)=-0.53$ ,  $p=0.03$  for anxiety and  $r(17)=-0.62$ ,  $p=0.008$   
952 for locomotion), which is indicative of increased overall anxiety and locomotion in individuals with  
953 reduced *FKBP5* DNA methylation under stressful conditions.  
954

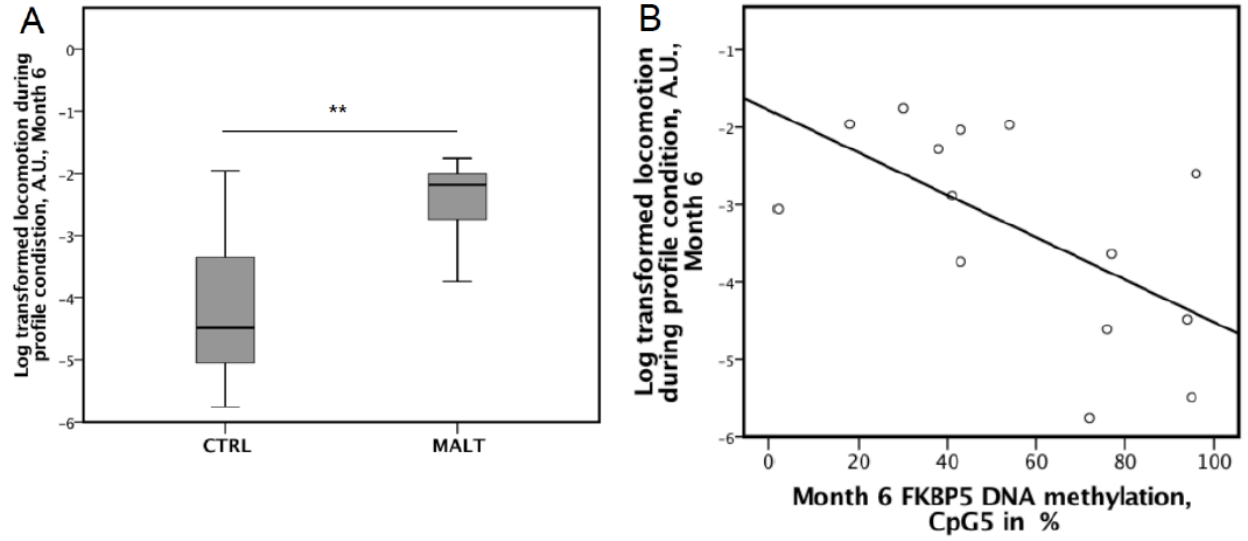

955  
956  
957  
958  
959  
960  
961  
962  
963  
964  
965  
966  
967  
968  
969  
970  
971  
972  
973  
974  
975  
976  
977  
978  
979

980 **Tables and Table Legends**

981

982 **Table 1. Demographic data of biological mothers, foster mothers and offspring.**

983 Demographic data for MALT and CTRL biological mothers, CTRL foster mothers, and offspring  
 984 are shown. Groups were balanced with respect to important confounding variables.

985

| <b>Biological Mothers</b>                                                | <b>MALT</b>          | <b>Min</b> | <b>Max</b> | <b>SD</b> | <b>CTRL</b>          | <b>Min</b> | <b>Max</b> | <b>SD</b> |                                      | <b>Combined</b> | <b>Min</b> | <b>Max</b> | <b>SD</b> |
|--------------------------------------------------------------------------|----------------------|------------|------------|-----------|----------------------|------------|------------|-----------|--------------------------------------|-----------------|------------|------------|-----------|
| Total N                                                                  | 9                    |            |            |           | 11                   |            |            |           |                                      | 20              |            |            |           |
| Mean Age (years)                                                         | 9.77                 | 5.92       | 18.27      | 3.86      | 10.06                | 6.94       | 16.06      | 3.06      | t(18)=0.18, p=0.85                   | 9.93            | 5.92       | 18.27      | 3.35      |
| Mean Gravida (N)                                                         | 4.33                 | 1          | 9          | 2.78      | 4.18                 | 2          | 11         | 2.64      | t(18)=-0.13, p=0.9                   | 4.25            | 1          | 11         | 2.63      |
| Mean Parity (N)                                                          | 4.11                 | 1          | 9          | 2.76      | 3.64                 | 1          | 10         | 2.5       | t(18)=-0.40, p=0.69                  | 3.85            | 1          | 10         | 2.56      |
| Social Rank (High/Middle/Low)                                            | 2/4/3                |            |            |           | 3/2/6                |            |            |           | X <sup>2</sup> (2, N=20)=1.68 p=0.43 | 5/6/9           |            |            |           |
| Mean DNA methylation CpG5 (%)                                            | 90.38 <sup>(1)</sup> | 78         | 100        | 8.29      | 91.56 <sup>(2)</sup> | 72         | 100        | 9.3       | t(15)=0.28, p=0.78                   | 91              | 72         | 100        | 8.59      |
| <b>Foster Mothers</b>                                                    | <b>MALT</b>          | <b>Min</b> | <b>Max</b> | <b>SD</b> | <b>CTRL</b>          | <b>Min</b> | <b>Max</b> | <b>SD</b> |                                      | <b>Combined</b> | <b>Min</b> | <b>Max</b> | <b>SD</b> |
| Total N                                                                  | 9                    |            |            |           | 11                   |            |            |           |                                      |                 |            |            |           |
| Mean Age (years)                                                         | 9.69                 | 6          | 14.02      | 2.97      | 11.04                | 6.94       | 17.82      | 3.66      | t(18)=0.89, p=0.38                   | 10.43           | 6          | 17.82      | 3.35      |
| Mean Gravida (N)                                                         | 4.56                 | 2          | 9          | 2.56      | 4.82                 | 2          | 11         | 3.13      | t(18)=0.20, p=0.84                   | 4.7             | 2          | 11         | 2.81      |
| Mean Parity (N)                                                          | 3.78                 | 1          | 7          | 2.22      | 4.09                 | 1          | 10         | 2.81      | t(18)=0.27, p=0.78                   | 3.95            | 1          | 10         | 2.63      |
| Social Rank (High/Middle/Low)                                            | 3/5/1                |            |            |           | 2/3/6                |            |            |           | X <sup>2</sup> (2, N=20)=4.11 p=0.13 | 5/8/7           |            |            |           |
| <b>Offspring</b>                                                         | <b>MALT</b>          |            |            |           | <b>CTRL</b>          |            |            |           |                                      |                 |            |            |           |
| Total N                                                                  | 9                    |            |            |           | 11                   |            |            |           |                                      | 20              |            |            |           |
| Sex (M/F)                                                                | 3/6                  |            |            |           | 6/5                  |            |            |           | X <sup>2</sup> (1, N=20)=0.9 p=0.34  | 9/11            |            |            |           |
| Social Rank Movement between Biological and Foster Mother (Down/None/Up) | 2/2/5                |            |            |           | 4/4/3                |            |            |           | X <sup>2</sup> (2, N=20)=1.65 p=0.44 |                 |            |            |           |

986

987 Footnotes: <sup>(1)</sup> N=8 and <sup>(2)</sup> N=9

988

989

990

991

992

993

994

995

996



997 **Table 2. Spearman's rank correlation of *FKBP5* methylation and behavioral phenotypes**  
 998 **during the Human Intruder Test in the offspring at month 6.** Table showing the alone (left),  
 999 profile (middle) and stare (right) conditions and correlations between month 6 *FKBP5*  
 1000 methylation and functional behavioral readouts. Negative correlations between DNA methylation  
 1001 and anxiety and locomotor activity indicates that reduces DNA methylation in our cohort is  
 1002 associated with increased levels of anxiety and locomotion.  
 1003

|                                                               |                | Alone              |                    |                    |                    | Profile            |                    |                    |                    | Stare              |                    |                    |                    |
|---------------------------------------------------------------|----------------|--------------------|--------------------|--------------------|--------------------|--------------------|--------------------|--------------------|--------------------|--------------------|--------------------|--------------------|--------------------|
|                                                               |                | Anx <sup>(1)</sup> | Loc <sup>(2)</sup> | Frz <sup>(3)</sup> | Coo <sup>(4)</sup> | Anx <sup>(1)</sup> | Loc <sup>(2)</sup> | Frz <sup>(3)</sup> | Coo <sup>(4)</sup> | Anx <sup>(1)</sup> | Loc <sup>(2)</sup> | Frz <sup>(3)</sup> | Coo <sup>(4)</sup> |
| <b>Month 6<br/><i>FKBP5</i><br/>DNA<br/>methy-<br/>lation</b> | Spearman's rho | -0.529             | -0.043             | 0.243              | -0.385             | -0.532             | -0.621             | 0.230              | -0.422             | -0.151             | 0.429              | 0.418              | -0.362             |
|                                                               | Sig. 2-tailed  | <b>0.029</b>       | 0.870              | 0.348              | 0.127              | <b>0.028</b>       | <b>0.008</b>       | 0.375              | 0.091              | 0.562              | 0.086              | 0.095              | 0.154              |
|                                                               | N              | 17                 | 17                 | 17                 | 17                 | 17                 | 17                 | 17                 | 17                 | 17                 | 17                 | 17                 | 17                 |

1004

1005 Footnotes: <sup>(1)</sup> Anx=Anxiety; <sup>(2)</sup> Loc=Locomotion; <sup>(3)</sup> Frz=Freezing; <sup>(4)</sup> Coo=Cooing
